# Supplementary material for: Multi-walled carbon nanotube supported manganese selenide as a highly active bifunctional OER and ORR electrocatalyst
Source: Royal Society of Chemistry journal article supplement (doi:10.1039/d1ta09864k), 2022-01-01
Supplement: d1ta09864k1.pdf [file d1ta09864k1.pdf]

## **Multi-walled carbon nanotube supported Manganese Selenide as Highly Active Bifunctional OER and ORR electrocatalyst**

Harish Singh<sup>a</sup>, McKenzie Marley-Hines<sup>a,b</sup>, Shatadru Chakravarty<sup>c</sup>, Manashi Nath<sup>a\*</sup>

\*Corresponding author email: [nathm@mst.edu](mailto:nathm@mst.edu)

### **Electrodeposition of Pt and RuO<sub>2</sub>**

The platinum was electrochemically deposited from a solution of 5mM K<sub>2</sub>PtCl<sub>6</sub> and 0.5M H<sub>2</sub>SO<sub>4</sub> at a potential step from 0.8 V to -0.25 V for 5 s and immediately from -0.25 to 0.25 V for 25 s.

Electrodeposition of RuO<sub>2</sub> on GC substrate was carried out from a mixture of RuCl<sub>3</sub> (0.452 g) and KCl (2.952 g) in 40 ml of 0.01M HCl by using cyclic voltammetry from 0.015 to 0.915 V (vs. Ag|AgCl) for 100 cycles at a scan rate of 50 mV s<sup>-1</sup>. Finally heated at 200 °C for 3 h in presence of Air.

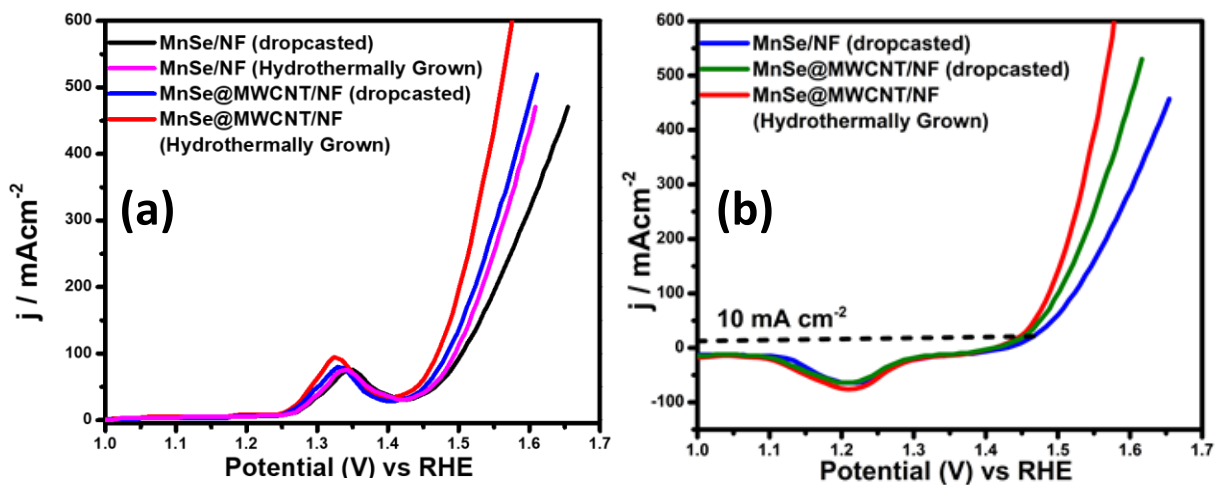

**Figure S1.** (a) Linear sweep voltammetry characterization showing the OER activity of MnSe and MnSe@MWCNT composite. (b) Estimation of overpotentials from reverse sweep of the CV plots.

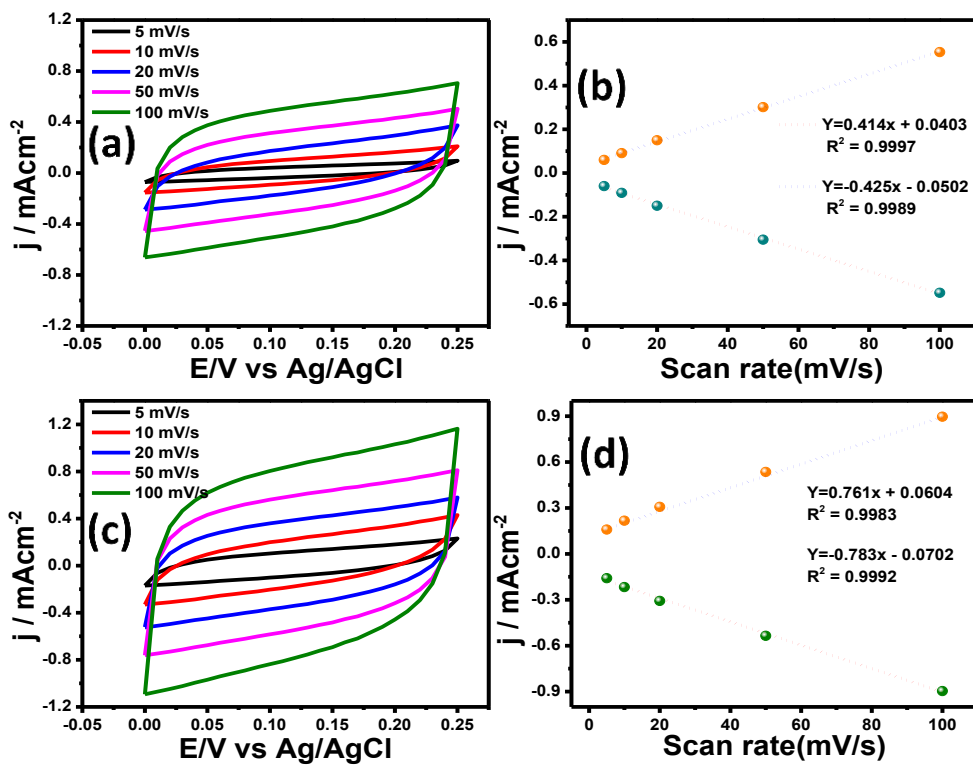

Figure S2. Cyclic voltammograms measured at different scan rates and corresponding plots of anodic and cathodic currents measured as a function of different scan rates for: (a,b) MnSe (c,d), MnSe@MWCNT .

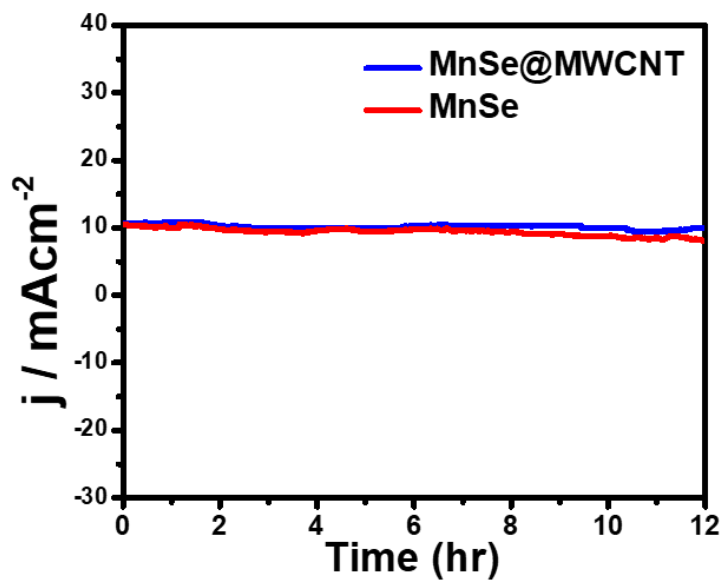

Figure S3. Chronoamperometry studies of the MnSe and MnSe@MWCNT electrodes at a constant applied potential of 1.55 V and 1.52 V respectively.

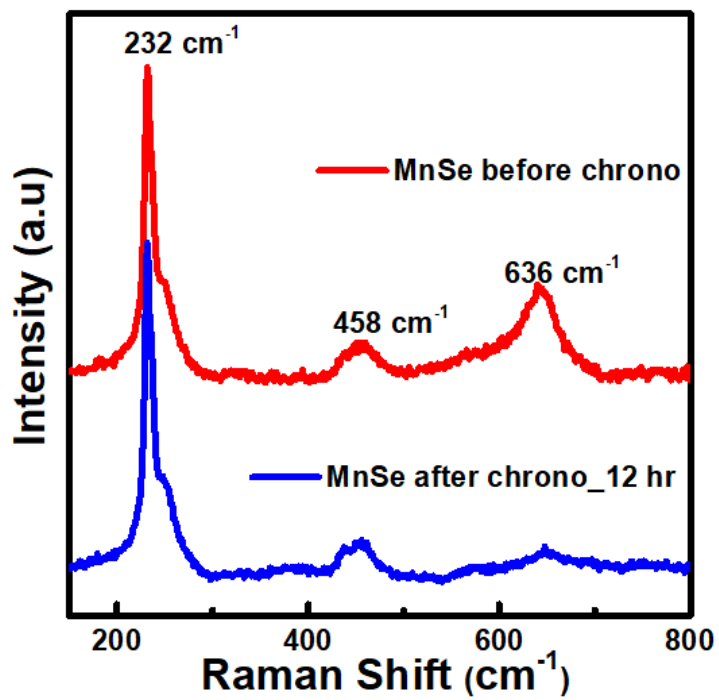

Figure S4. Raman spectra of MnSe before and after 12 hr of chronoamperometry studies.

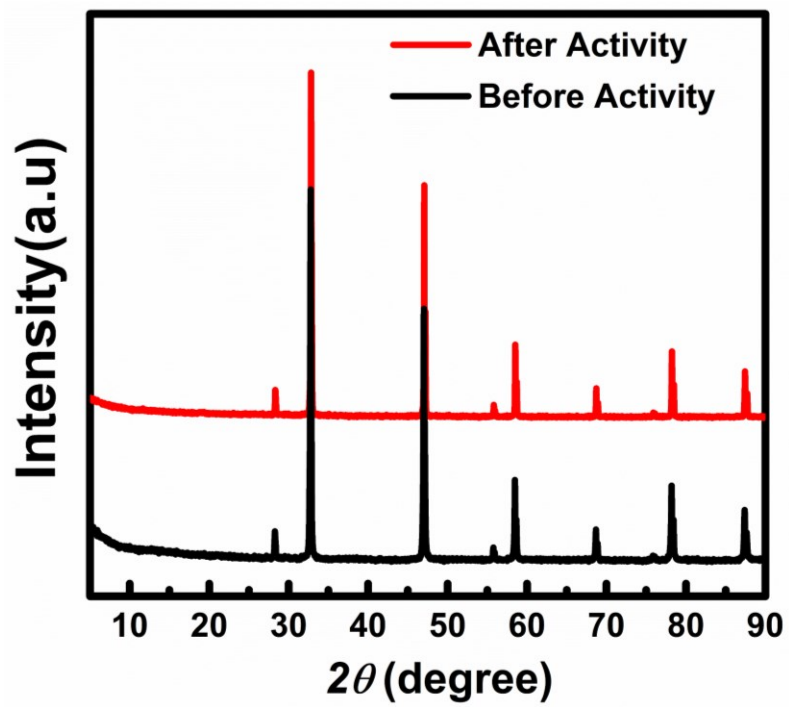

Figure S5. PXRD pattern of MnSe@MWCNT before and after 12 hr of chronoamperometry studies.

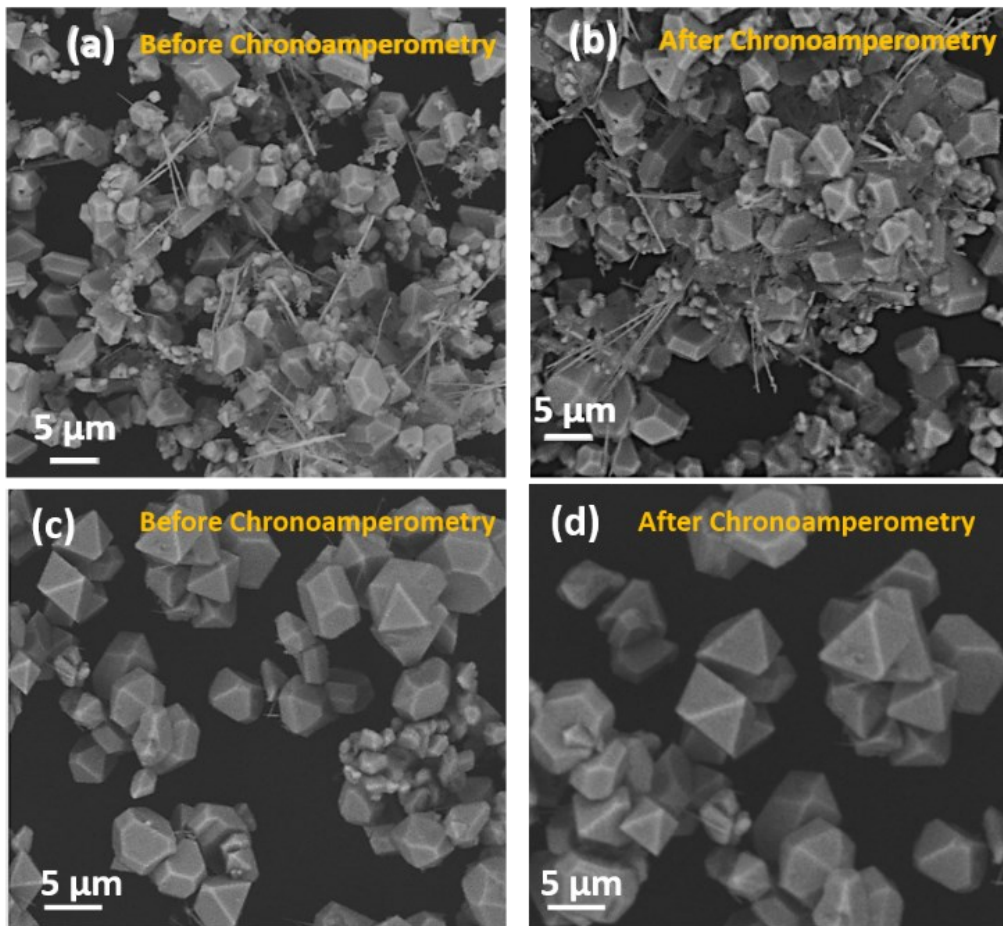

**Figure S6.** SEM images of (a,b) MnSe@MWCNT and (c,d) MnSe before and after 12 hr of chronoamperometry studies.

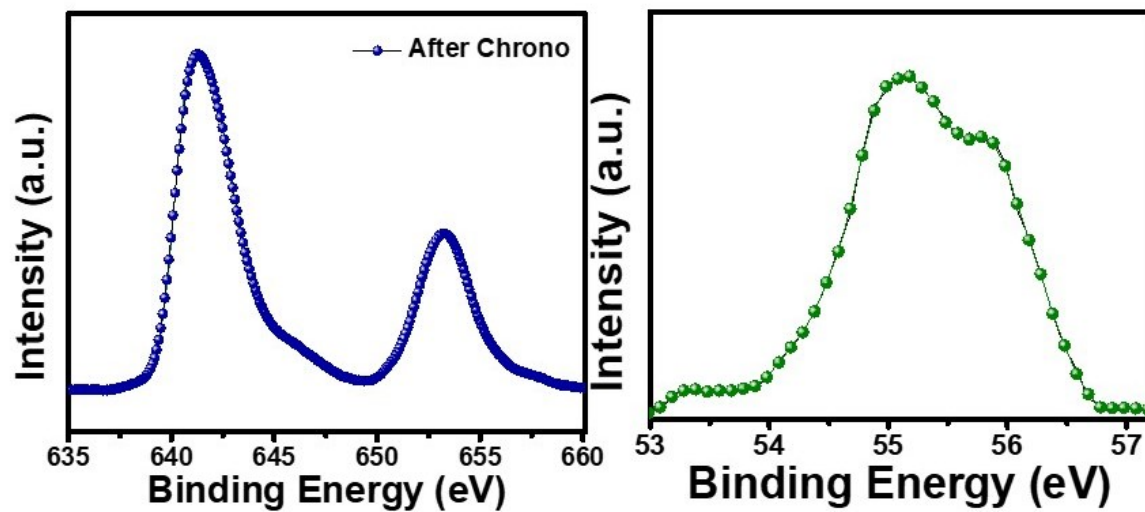

Figure S7. XPS spectra of MnSe@MWCNT (data collected at same spot where surface Raman spectra collected) after OER chronoamperometry.



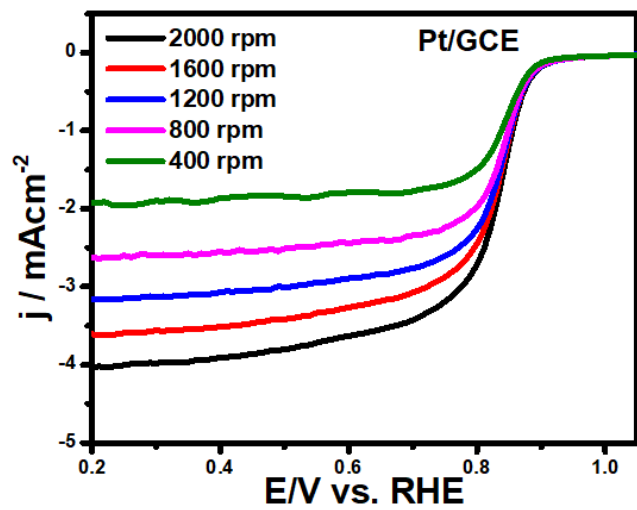

Figure S8. RDE linear sweep voltammograms of Pt/GCE catalysts at a different rotating speed.

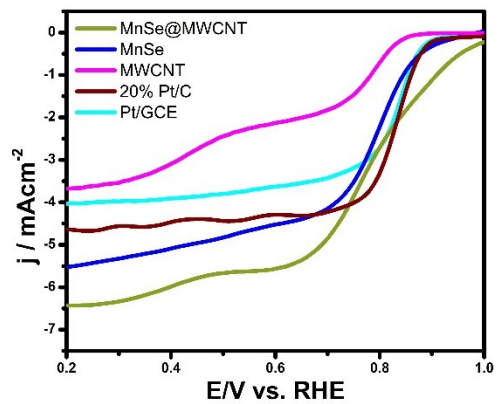

Figure S9. Comparison of ORR activity of MnSe and MnSe@MWCNT with Pt-based electrodes at rotating speed of 2000 rpm.

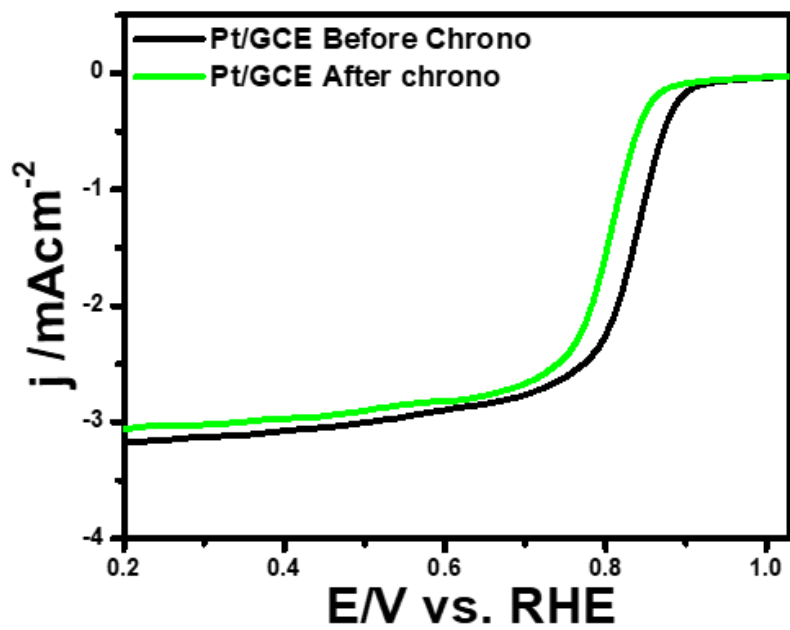

Figure S10. LSV before and after chronoamperometry studies of Pt/GCE.

**Table S1.** Comparison of electrocatalytic parameters of Manganese based catalysts for OER

| OER Catalysts                                                                                                 | Electrolytes   | Onset potential/V | $\eta$ @ 10 mA cm <sup>-2</sup> (mV vs RHE) | Tafel slope mV dec <sup>-1</sup> | Reference        |
|---------------------------------------------------------------------------------------------------------------|----------------|-------------------|---------------------------------------------|----------------------------------|------------------|
| $\alpha$ -MnO <sub>2</sub> -H <sub>2</sub>                                                                    | 0.1 M KOH      | 1.6               | 508                                         | 213.5                            | 1                |
| MnO <sub>x</sub> NWs                                                                                          | 0.1 M KOH      | -                 | 519                                         | 106                              | 2                |
| Metal-doped MnO <sub>2</sub>                                                                                  | 1 M KOH        | -                 | 390                                         | 104.4                            | 3                |
| Ni-MnO <sub>2</sub>                                                                                           | 1 M KOH        | -                 | 330                                         | 23.7                             | 4                |
| MnO <sub>2</sub> /CQD                                                                                         | 1 M KOH        | 1.34              | 343                                         | 43.6                             | 5                |
| $\alpha$ -MnS                                                                                                 | 1 M KOH        | -                 | 292                                         | 70                               | 6                |
| $\alpha$ -MnO <sub>2</sub> /MnOOH                                                                             | 1 M KOH        |                   | 302                                         | 51.3                             | 7                |
| Mn <sub>0.6</sub> Zn <sub>0.4</sub> Co <sub>2</sub> O <sub>4</sub> /rGO                                       | 1 M KOH        | 1.48              | 320                                         | 80.6                             | 8                |
| MnO <sub>x</sub> /OCNT                                                                                        | 0.1 M KOH      | -                 | 520                                         | 105                              | 9                |
| MnFeSe                                                                                                        | 1 M KOH        | -                 | 247                                         | 35                               | 10               |
| Mn <sub>1.2</sub> Fe <sub>0.8</sub> O <sub>3</sub>                                                            | 1 M KOH        | -                 | 245                                         | 38                               | 11               |
| Co <sub>1</sub> Mn <sub>1</sub> NBs                                                                           | 1 M KOH        | -                 | 221                                         | 39.8                             | 12               |
| Mn <sub>0.3</sub> (Fe <sub>0.3</sub> Ni <sub>0.7</sub> ) <sub>0.5</sub> O <sub>x</sub> /MWCNTs-O <sub>x</sub> | 0.1 M KOH      | -                 | 330                                         | -                                | 13               |
| Mn-Co-Se/NF                                                                                                   | 1 M KOH        | -                 | 243                                         | 62                               | 14               |
| <b>MnSe/NF (drop casted)</b>                                                                                  | <b>1 M KOH</b> | 1.46              | 237*                                        | -                                | <b>This Work</b> |
| <b>MnSe/NF (Hydrothermally grown)</b>                                                                         | <b>1 M KOH</b> | 1.45              | 230*                                        | -                                | <b>This Work</b> |
| <b>MnSe@MWCNT/NF (drop casted)</b>                                                                            | <b>1 M KOH</b> | 1.42              | 223*                                        | -                                | <b>This Work</b> |
| <b>MnSe@MWCNT/NF (Hydrothermally grown)</b>                                                                   | <b>1 M KOH</b> | 1.41              | 210*                                        | -                                | <b>This Work</b> |
| <b>MnSe/CC</b>                                                                                                | <b>1 M KOH</b> | <b>1.49</b>       | <b>310</b>                                  | <b>61.43</b>                     | <b>This Work</b> |
| <b>MnSe@MWCNT/CC</b>                                                                                          | <b>1 M KOH</b> | <b>1.47</b>       | <b>290</b>                                  | <b>54.76</b>                     | <b>This Work</b> |
| <b>RuO<sub>2</sub>/CC</b>                                                                                     | <b>1 M KOH</b> | <b>1.53</b>       | <b>380</b>                                  | <b>114.91</b>                    | <b>This Work</b> |

\*  $\eta$  @ 50 mA cm<sup>-2</sup> (mV vs RHE); CC-Carbon Cloth; NF-Nickel Foam

**Table S2.** Comparison of overpotentials of MnSe-based composites and other reported systems at higher current densities.

| OER Catalysts                                                          | $\eta$ @ 10 mA cm <sup>-2</sup><br>(mV vs RHE) | $\eta$ @ 50 mA cm <sup>-2</sup><br>(mV vs RHE) | $\eta$ @ 100 mA cm <sup>-2</sup><br>(mV vs RHE) | $\eta$ @ 500 mA cm <sup>-2</sup><br>(mV vs RHE) | Reference        |
|------------------------------------------------------------------------|------------------------------------------------|------------------------------------------------|-------------------------------------------------|-------------------------------------------------|------------------|
| <b>MnSe@MWCNT/NF<br/>(Hydrothermally grown)</b>                        | <b>182</b>                                     | <b>210</b>                                     | <b>250</b>                                      | <b>330</b>                                      | <b>This Work</b> |
| <b>MnSe/NF<br/>(Hydrothermally grown)</b>                              | <b>220</b>                                     | <b>230</b>                                     | <b>290</b>                                      | <b>380</b>                                      | <b>This Work</b> |
| <b>MnSe@MWCNT/NF<br/>(drop casted)</b>                                 | <b>208</b>                                     | <b>223</b>                                     | <b>270</b>                                      |                                                 | <b>This Work</b> |
| <b>MnSe@MWCNT/CC</b>                                                   | <b>290</b>                                     | <b>390</b>                                     | -                                               | -                                               | <b>This Work</b> |
| <b>MnSe/CC</b>                                                         | <b>310</b>                                     | <b>340</b>                                     | -                                               | -                                               | <b>This Work</b> |
| MnFeSe/NF                                                              | 247                                            | 279                                            | 296                                             | -                                               | 10               |
| Co <sub>1</sub> Mn <sub>1</sub> LDH/NF                                 | 285                                            | 350                                            | 390                                             | -                                               | 15               |
| Mn-Ni <sub>2</sub> P-0.053/NF                                          | -                                              | 299                                            | 330                                             | -                                               | 16               |
| CMS/NF                                                                 | -                                              | -                                              | 292                                             | -                                               | 17               |
| Mn <sub>x</sub> Ni <sub>2-x</sub> P                                    | 196                                            | 270                                            | 370                                             | -                                               | 18               |
| Mn-F/Ni(OH) <sub>2</sub> -NF                                           | -                                              | 337                                            | 420                                             | -                                               | 19               |
| MnGa <sub>4</sub> /NF                                                  | 291                                            | 370                                            | 402                                             | 560                                             | 20               |
| Mn <sub>3</sub> O <sub>4</sub> /NF                                     | 287                                            | 310                                            | -                                               | -                                               | 21               |
| FeCo(Mn)-O/NF                                                          | 235                                            | 250                                            | 280                                             | -                                               | 22               |
| Fe <sub>3</sub> Mn-Ni <sub>3</sub> S <sub>2</sub> /NF                  | -                                              | 230                                            | 260                                             | -                                               | 23               |
| Ni-Co <sub>3</sub> O <sub>4</sub> NS/NF                                | 310                                            | -                                              | 390                                             | -                                               | 24               |
| MnCoP/CC                                                               | 261                                            | -                                              | 460                                             | -                                               | 25               |
| Ni <sub>3</sub> Se <sub>2</sub> /NF                                    | -                                              | -                                              | 315                                             | -                                               | 26               |
| Co <sub>0.75</sub> Ni <sub>0.25</sub> Se/NF                            | -                                              | 269                                            | 290                                             | -                                               | 27               |
| Fe-NiSe/NF                                                             | -                                              | 261                                            | 275                                             | 290                                             | 28               |
| P-Ni <sub>3</sub> S <sub>2</sub> /CoFe <sub>2</sub> O <sub>4</sub> /NF | -                                              | 254                                            | 269                                             | -                                               | 29               |
| FeCoNiS <sub>x</sub> /NF                                               | 231                                            | 250                                            | 280                                             | -                                               | 30               |
| Fe <sub>7.4%</sub> -NiSe/NF                                            |                                                | 231                                            | 245                                             | -                                               | 31               |
| Ni <sub>3</sub> Se <sub>2</sub> /NF                                    | 270                                            | 410                                            | 570                                             | -                                               | 32               |

**Table S3.** Comparison of electrocatalytic parameters of Manganese based catalysts for ORR

| ORR Catalysts                                                                                                 | Electrolytes   | $E_{\text{onset}}$ vs. RHE(V) | $E_{1/2}$ [V vs RHE] | $J_L$ (mA $\text{cm}^{-2}$ ) | Reference        |
|---------------------------------------------------------------------------------------------------------------|----------------|-------------------------------|----------------------|------------------------------|------------------|
| $\alpha$ -MnO <sub>2</sub> -H <sub>2</sub>                                                                    | 0.1 M KOH      | 0.93                          | 0.73                 | 4.70                         | 1                |
| $\alpha$ -MnO <sub>2</sub> NWs                                                                                | 0.1 M KOH      | 0.94                          | 0.72                 | 5.48                         | 33               |
| $\alpha$ -MnO <sub>2</sub> NRs                                                                                | 0.1 M KOH      | 0.86                          | 0.67                 | 4.40                         | 33               |
| $\beta$ -MnO <sub>2</sub>                                                                                     | 0.1 M KOH      | 0.89                          | 0.76                 | 5.75                         | 34               |
| MnO <sub>2</sub> /NRGO_Urea                                                                                   | 0.1 M KOH      | 0.94                          | 0.8                  | 5.1                          | 35               |
| MnO <sub>2</sub> /C                                                                                           | 0.1 M KOH      | 0.88                          | 0.67                 | 4.52                         | 35               |
| $\alpha$ -MnO <sub>2</sub> -80                                                                                | 0.1 M KOH      | 0.92                          | 0.79                 | 5.67                         | 36               |
| MnO                                                                                                           | 0.1 M KOH      | 0.82                          | -                    | 42.8                         | 37               |
| MnS                                                                                                           | 0.1 M KOH      | 0.86                          | -                    | 4.66                         | 37               |
| MnSe                                                                                                          | 0.1 M KOH      | 0.91                          | -                    | 5.82                         | 37               |
| MnS/G                                                                                                         | 0.1 M KOH      | 0.83                          | 0.71                 | 3.79                         | 38               |
| Defected Mn <sub>3</sub> O <sub>4</sub>                                                                       | 0.1 M KOH      | 0.87                          | 0.65                 | 5                            | 39               |
| Mn <sub>0.5</sub> (Fe <sub>0.3</sub> Ni <sub>0.7</sub> ) <sub>0.5</sub> O <sub>x</sub> /MWCNTs-O <sub>x</sub> | 0.1 M KOH      | 0.84                          | 0.81                 | -                            | 13               |
| <b>MnSe</b>                                                                                                   | <b>1 M KOH</b> | <b>0.91</b>                   | <b>0.82</b>          | <b>5.1</b>                   | <b>This Work</b> |
| <b>MnSe@MWCNT</b>                                                                                             | <b>1 M KOH</b> | <b>0.94</b>                   | <b>0.86</b>          | <b>6.03</b>                  | <b>This Work</b> |
| <b>Pt/GCE</b>                                                                                                 | <b>1 M KOH</b> | <b>0.92</b>                   | <b>0.81</b>          | <b>3.92</b>                  | <b>This Work</b> |

**Table S4.** Equivalent Circuit Parameters Obtained from Fitting of EIS Experimental Data

| Parameter                  | MnSe@MWCNT | MnSe |
|----------------------------|------------|------|
| $R_f/\Omega$               | 6.4        | 8.5  |
| $R_{ct}/\Omega$            | 18.6       | 28.4 |
| CPE <sub>catalyst</sub> /F | 0.8        | 1.4  |
| $Z_w$                      | 0.76       | 1.48 |

## Notes and references

- 1 Q. Zhuang, N. Ma, Z. Yin, X. Yang, Z. Yin, J. Gao, Y. Xu, Z. Gao, H. Wang, J. Kang, D. Xiao, J. Li, X. Li and D. Ma, *Adv. Energy Sustain. Res.*, 2021, **2**, 2100030.
- 2 X. F. Luo, J. Wang, Z. S. Liang, S. Z. Chen, Z. L. Liu and C. W. Xu, *Int. J. Hydrogen Energy*, 2017, **42**, 7151–7157.
- 3 Z. Ye, T. Li, G. Ma, Y. Dong and X. Zhou, *Adv. Funct. Mater.*, 2017, **27**, 1704083.
- 4 Y. Yang, X. Su, L. Zhang, P. Kerns, L. Achola, V. Hayes, R. Quardokus, S. L. Suib and J. He, *ChemCatChem*, 2019, **11**, 1689–1700.
- 5 L. Tian, J. Wang, K. Wang, H. Wo, X. Wang, W. Zhuang, T. Li and X. Du, *Carbon N. Y.*, 2019, **143**, 457–466.
- 6 R. B. Pujari, G. S. Gund, S. J. Patil, H. S. Park and D.-W. Lee, *J. Mater. Chem. A*, 2020, **8**, 3901–3909.
- 7 Jincan Jia, Lei Li, Xiao Lian, Mingzai Wu, Fangcai Zheng, Li Song, Guangzhi Hu and Helin Niu, *Nanoscale*, 2021, **13**, 11120–11127.
- 8 A. Rebekah, S. Anantharaj, C. Viswanthan and N. Ponpandian, *Int. J. Hydrogen Energy*, 2020, **45**, 14713–14727.
- 9 Hendrik Antoni, Wei Xia, Justus Masa, Wolfgang Schuhmann and Martin Muhler, *Phys. Chem. Chem. Phys.*, 2017, **19**, 18434–18442.
- 10 M. Sun, R.-T. Gao, X. Liu, R. Gao and L. Wang, *J. Mater. Chem. A*, 2020, **8**, 25298–25305.
- 11 Q. Ma, R. Dong, H. Liu, A. Zhu, L. Qiao, Y. Ma, J. Wang, J. Xie and J. Pan, *J. Alloys Compd.*, 2020, **820**, 153438.
- 12 H. Xu, J. Wei, K. Zhang, M. Zhang, C. Liu, J. Guo and Y. Du, *J. Mater. Chem. A*, 2018, **6**, 22697–22704.
- 13 D. M. Morales, M. A. Kazakova, S. Dieckhöfer, A. G. Selyutin, G. V. Golubtsov, W. Schuhmann and J. Masa, *Adv. Funct. Mater.*, 2020, **30**, 1905992.
- 14 G. Mei, H. Liang, B. Wei, H. Shi, F. Ming, X. Xu and Z. Wang, *Electrochim. Acta*, 2018, **290**, 82–89.
- 15 Z. Wang, Y. Hu, W. Liu, L. Xu, M. Guan, Y. Zhao, J. Bao and H. Li, *Chem. – A Eur. J.*, 2020, **26**, 9382–9388.
- 16 P. Xu, L. Qiu, L. Wei, Y. Liu, D. Yuan, Y. Wang and P. Tsiakaras, *Catal. Today*, 2020, **355**, 815–821.
- 17 J. Li, W. Xu, J. Luo, D. Zhou, D. Zhang, L. Wei, P. Xu and D. Yuan, *Nano-Micro Lett.*, 2018, **10**, 1–10.
- 18 H. Yang, M. Yuan, D. Wang, Z. Sun, H. Li and G. Sun, *ACS Appl. Energy Mater.*, 2021, **4**, 8563–8571.
- 19 J. Lv, X. Yang, K. Li, X. Chen, S. Sun, H. Y. Zang, Y. F. Chang, Y. H. Wang and Y. G. Li, *Nanoscale Adv.*, 2019, **1**, 4099–4108.
- 20 P. W. Menezes, C. Walter, J. An, N. Hausmann, R. Beltrun-Suito, C. Schlesiger, S. Praetz, Y. V Erchenko, A. Ndrej, V. Shevelkov, M. Driess, P. W. Menezes, J C Walter, J. N. Hausmann, R. Beltrun-Suito, C. Schlesiger, S. Praetz, V. Y. U. Verchenko and A. V. S. Hevelkov, *Angew. Chemie Int. Ed.*, 2019, **58**, 16569–16574.
- 21 M. Q. Yu, Y. H. Li, S. Yang, P. F. Liu, L. F. Pan, L. Zhang and H. G. Yang, *J. Mater. Chem. A*, 2015, **3**, 14101–14104.
- 22 S.-N. Wu, Y.-F. Qi, Q. Wang, X.-G. Wang, X.-J. Zhao, E.-C. Yang, - N Wu, Y.-F. Qi, + Q Wang, X.-G. Wang, X.-J. Zhao and E.-C. Yang, *ChemElectroChem*, 2020, **7**, 684–690.
- 23 J. J. Duan, Z. Han, R. L. Zhang, J. J. Feng, L. Zhang, Q. L. Zhang and A. J. Wang, *J. Colloid Interface Sci.*, 2021, **588**, 248–256.
- 24 L. Zeng, K. Zhou, L. Yang, G. Du, L. Liu and W. Zhou, *ACS Appl. Energy Mater.*, 2018, **1**, 6279–6287.
- 25 M. Wang, W. Fu, L. Du, Y. Wei, P. Rao, L. Wei, X. Zhao, Y. Wang and S. Sun, *Appl. Surf. Sci.*, 2020, **515**, 146059.
- 26 A. Sivanantham and S. Shanmugam, *Appl. Catal. B Environ.*, 2017, **203**, 485–493.
- 27 S. Liu, Y. Jiang, M. Yang, M. Zhang, Q. Guo, W. Shen, R. He and M. Li, *Nanoscale*, 2019, **11**, 7959–7966.
- 28 Q. Zhao, D. Zhong, L. Liu, D. Li, G. Hao and J. Li, *J. Mater. Chem. A*, 2017, **5**, 14639–14645.
- 29 J. J. Duan, R. L. Zhang, J. J. Feng, L. Zhang, Q. L. Zhang and A. J. Wang, *J. Colloid Interface Sci.*, 2021, **581**, 774–782.
- 30 R. L. Zhang, J. J. Duan, J. J. Feng, L. P. Mei, Q. L. Zhang and A. J. Wang, *J. Colloid Interface Sci.*, 2021, **587**, 141–149.

- 31 Z. Zou, X. Wang, J. Huang, Z. Wu and F. Gao, *J. Mater. Chem. A*, 2019, **7**, 2233–2241.
- 32 A. T. Swesi, J. Masud and M. Nath, *Energy Environ. Sci.*, 2016, **9**, 1771–1782.
- 33 K. Lei, L. Cong, X. Fu, F. Cheng and J. Chen, *Inorg. Chem. Front.*, 2016, **3**, 928–933.
- 34 L. Li, X. Feng, Y. Nie, S. Chen, F. Shi, K. Xiong, W. Ding, X. Qi, J. Hu, Z. Wei, L.-J. Wan and M. Xia, *ACS Catal.*, 2015, **5**, 4825–4832.
- 35 B. Chen, H. Miao, R. Hu, M. Yin, X. Wu, S. Sun, Q. Wang, S. Li and J. Yuan, *J. Alloys Compd.*, 2021, **852**, 157012.
- 36 B. Lan, X. Zheng, G. Cheng, J. Han, W. Li, M. Sun and L. Yu, *Electrochim. Acta*, 2018, **283**, 459–466.
- 37 X. Liu, J. Du, C. Li, X. Han, X. Hu, F. Cheng and J. Chen, *J. Mater. Chem. A*, 2015, **3**, 3425–3431.
- 38 A. Arunchander, S. G. Peera and A. K. Sahu, *ChemElectroChem*, 2017, **4**, 1544–1553.
- 39 Y. C. Zhang, S. Ullah, R. Zhang, L. Pan, X. Zhang and J. J. Zou, *Appl. Catal. B Environ.*, 2020, **277**, 119247.
